# Supplementary figures and images for: Impact of alpha‐tocopherol deficiency and supplementation on sacrocaudalis and gluteal muscle fiber histopathology and morphology in horses
Source: PubMed Central journal article supplement — J Vet Intern Med. 2019 Oct 29;33(6):2770–9. doi: 10.1111/jvim.15643 (PMC6872615; doi:10.1111/jvim.15643), 2019-10-29

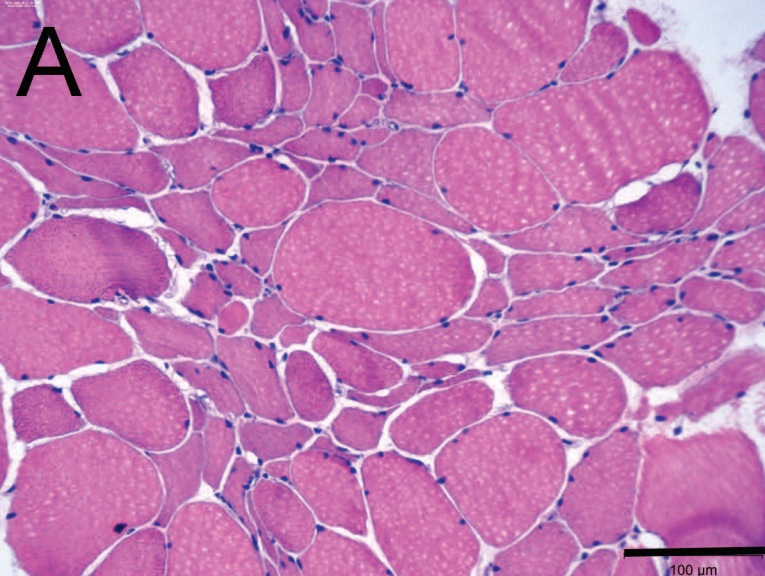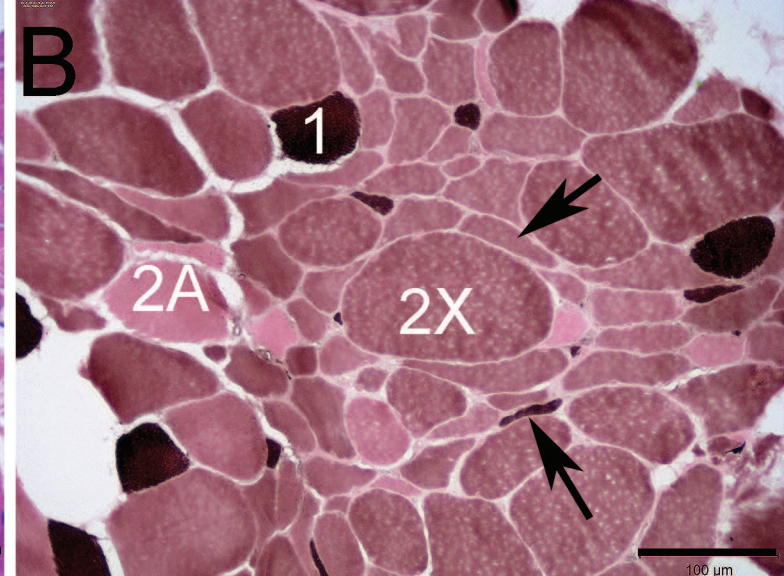

Supplement: JVIM-33-2770-s001.pdf [file JVIM-33-2770-s001.pdf]
